CORRECTION

# Correction: Prescribing patterns and associated factors of antibiotic prescription in primary health care facilities of Kumbo East and Kumbo West Health Districts, North West Cameroon

The *PLOS ONE* Staff

## Notice of republication

This article was republished on April 23, 2018, as the original Supporting Information file S1 Text was published in error. The publisher apologizes for the error. Please download this article again to view the correct version. The originally published, uncorrected article and the republished, corrected article are provided here for reference.

## Supporting information

**S1 File. Originally published, uncorrected article.**  
(PDF)

**S2 File. Republished corrected article.**  
(PDF)

## Reference

1. Chem ED, Anong DN, Akoachere J-FKT (2018) Prescribing patterns and associated factors of antibiotic prescription in primary health care facilities of Kumbo East and Kumbo West Health Districts, North West Cameroon. *PLoS ONE* 13(3): e0193353. <https://doi.org/10.1371/journal.pone.0193353> PMID: 29505584

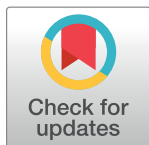

## OPEN ACCESS

**Citation:** The *PLOS ONE* Staff (2018) Correction: Prescribing patterns and associated factors of antibiotic prescription in primary health care facilities of Kumbo East and Kumbo West Health Districts, North West Cameroon. *PLoS ONE* 13(4): e0196861. <https://doi.org/10.1371/journal.pone.0196861>

**Published:** April 30, 2018

**Copyright:** © 2018 The PLOS ONE Staff. This is an open access article distributed under the terms of the [Creative Commons Attribution License](https://creativecommons.org/licenses/by/4.0/), which permits unrestricted use, distribution, and reproduction in any medium, provided the original author and source are credited.
